# Supplementary material for: 3-D Microwell Array System for Culturing Virus Infected Tumor Cells
Source: PubMed Central journal article supplement (PMC5177905; doi:10.1038/srep39144), 2016-12-22
Supplement: srep39144-s1.pdf [file srep39144-s1.pdf]

1 **SUPPLEMENTARY INFORMATION**

2  
3 **3-D Microwell Array System for Culturing Virus Infected Tumor Cells**

4  
5 *Rami El Assal<sup>1</sup>, Umut Atakan Gurkan<sup>2,3</sup>, Pu Chen<sup>1</sup>, Franceline Juillard<sup>4</sup>,*  
6 *Alessandro Tocchio<sup>1</sup>, Thiruppathiraja Chinnasamy<sup>1</sup>, Chantal Beauchemin<sup>4</sup>,*  
7 *Sebnem Unluisler<sup>2</sup>, Serli Canikyan<sup>2</sup>, Alyssa Holman<sup>1</sup>, Srikar Srivatsa<sup>1</sup>,*  
8 *Kenneth M. Kaye<sup>4\*</sup>, Utkan Demirci<sup>1,2,5\*</sup>*

9  
10 <sup>1</sup> Demirci Bio-Acoustic-MEMS in Medicine (BAMM) Laboratories, Canary Center  
11 at Stanford for Cancer Early Detection, Department of Radiology, Stanford  
12 University School of Medicine, Palo Alto, CA, 94304, USA

13  
14 <sup>2</sup> Demirci Bio-Acoustic-MEMS in Medicine (BAMM) Laboratories, Division for  
15 Biomedical Engineering, Division of Infectious Diseases, Renal Division,  
16 Department of Medicine, Brigham and Women's Hospital, Harvard Medical  
17 School, Boston, MA, 02115, USA

18  
19 <sup>3</sup> Biomanufacturing and Microfabrication Laboratory, Mechanical and Aerospace  
20 Engineering Department, Biomedical Engineering Department, Department of  
21 Orthopedics, Advanced Platform Technology Center, Louis Stokes Cleveland  
22 Veterans Affairs Medical Center, Case Western Reserve University, Cleveland,  
23 OH, 44106, USA

24  
25 <sup>4</sup> Division of Infectious Diseases, Departments of Medicine, Brigham and  
26 Women's Hospital, Harvard Medical School, Boston, MA, 02115, USA

27  
28 <sup>5</sup> Department of Electrical Engineering (by courtesy), Stanford University School  
29 of Engineering, Stanford, CA, 94305, USA.

30  
31 \* Corresponding Author's E-mail: [utkan@stanford.edu](mailto:utkan@stanford.edu); [kkaye@bwh.harvard.edu](mailto:kkaye@bwh.harvard.edu)

32

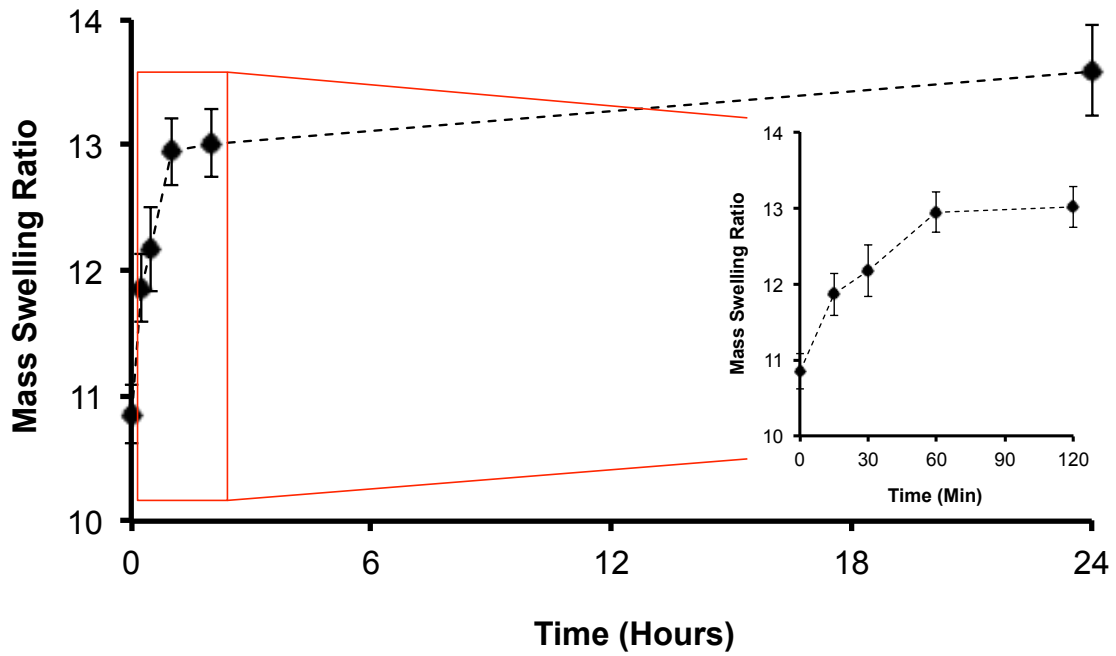

33

34 **Supplementary Figure 1. Mass swelling ratio of PEG hydrogels.** The mass  
35 swelling ratio of the hydrogels (n=10) was measured for up to 24 hours. The  
36 hydrogels reached the swelling plateau in about a 1 hour incubation period.

37

38

39

40

41

42

43

44

45

46

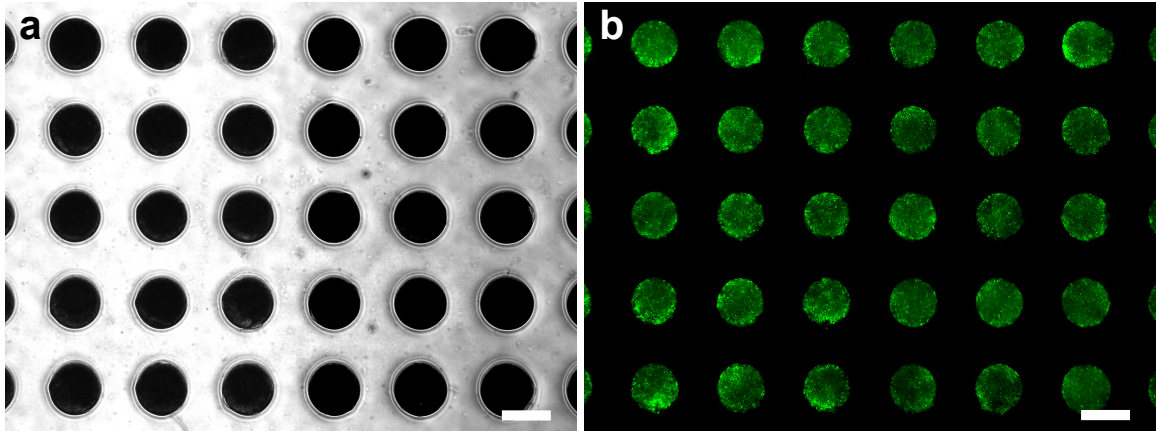

47

48 **Supplementary Figure 2. Photomicrographs showing the microwell array**

49 **system.** The KSHV infected BJAB cells with puromycin selection were imaged

50 after 10 days in culture using bright field (a) and fluorescence (b)

51 photomicrographs. Scale bar represents 450  $\mu\text{m}$ .

52

53

54

55

56

57

58

59

60

61

62

63

64

65

66

67

68

69

70

71  
72  
73  
74  
75  
76  
77  
78  
79  
80  
81  
82  
83  
84  
85  
86  
87  
88  
89  
90  
91  
92  
93  
94  
95  
96  
97  
98  
99  
100  
101

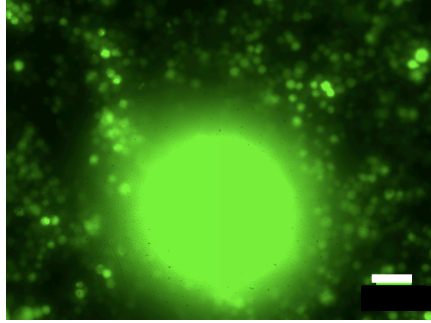

**Supplementary Figure 3. Fluorescent photomicrograph showing cell spillover from a microwell.** After proliferating BJAB (infected) fill a 3-D microwell, cells begin to spillover the top. This image was taken on day 14. Scale bar represents 100  $\mu\text{m}$ .

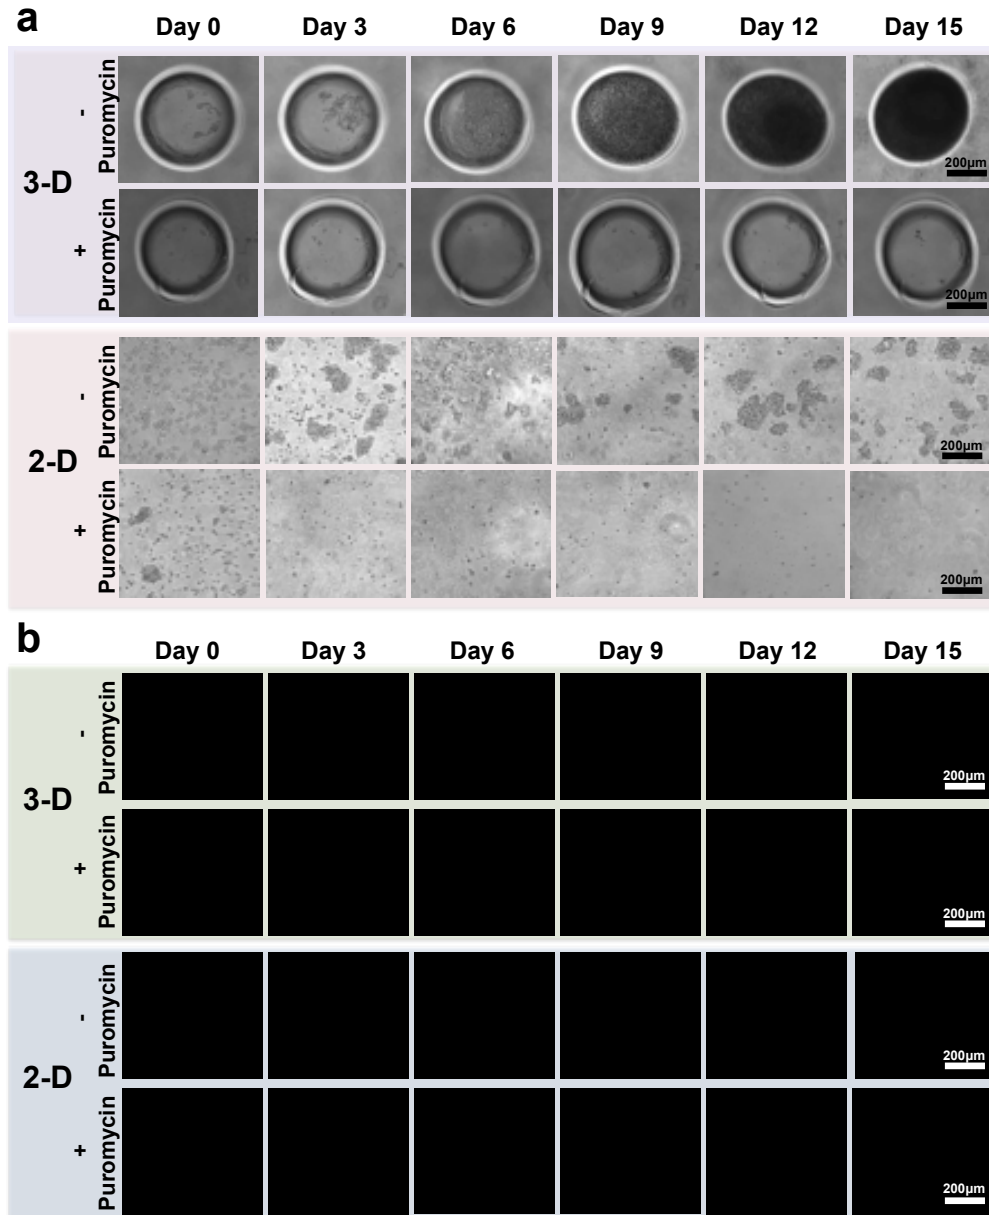

102

103 **Supplementary Figure 4. Uninfected BJAB cells maintained in 3-D 450  $\mu$ m**  
 104 **microwells or 2-D suspension, both with (+) and without (-) puromycin**  
 105 **selection. a) Brightfield photomicrographs of BJAB cells grown for 15 days.**  
 106 **Images were taken at 3-day intervals, beginning with the day of seeding. Growth**  
 107 **was observed for the 3-D grown cells without puromycin selection but not with**  
 108 **puromycin. b) Fluorescent photomicrographs of BJAB cells grown for 15 days.**  
 109 **We did not observe fluorescent cells, since the cells lack infection with KSHV.**  
 110 **Scale bars represent 200  $\mu$ m.**

111

**Supplementary Table 1.** Comparison of 3-D model generation methods.

| <b>Method</b>  | <b>Advantages</b>                                                                                                                                                                                     | <b>Disadvantages</b>                                                                                                                                                                                                                                            |
|----------------|-------------------------------------------------------------------------------------------------------------------------------------------------------------------------------------------------------|-----------------------------------------------------------------------------------------------------------------------------------------------------------------------------------------------------------------------------------------------------------------|
| Hanging Drop   | <ul style="list-style-type: none"> <li>- Inexpensive</li> <li>- Simple</li> <li>- Fast 3-D model formation</li> </ul>                                                                                 | <ul style="list-style-type: none"> <li>- Scale-up is difficult</li> <li>- Long-term culture is difficult</li> <li>- Instability of the liquid-air interface</li> <li>- Time-consuming</li> <li>- Labor-intensive</li> </ul>                                     |
| Spinner Flasks | <ul style="list-style-type: none"> <li>- Simple</li> <li>- Ease to scale-up</li> <li>- Long-term culture</li> </ul>                                                                                   | <ul style="list-style-type: none"> <li>- Specialized equipment is required.</li> <li>- Variation in size/cell number</li> <li>- High shear stress</li> </ul>                                                                                                    |
| Rotary System  | <ul style="list-style-type: none"> <li>- Simple</li> <li>- Ease to scale-up</li> <li>- Long-term culture</li> </ul>                                                                                   | <ul style="list-style-type: none"> <li>- Specialized equipment is required.</li> <li>- Variation in size/cell number</li> </ul>                                                                                                                                 |
| Assembly       | <ul style="list-style-type: none"> <li>- Fast 3-D model formation</li> <li>- Reconfigurable method</li> <li>- Non-invasive method</li> </ul>                                                          | <ul style="list-style-type: none"> <li>- Specialized equipment is required (e.g., acoustic generator or micro-robotic system)</li> <li>- May require magnetic nanoparticles</li> </ul>                                                                          |
| Bioprinting    | <ul style="list-style-type: none"> <li>- Fast 3-D model formation.</li> <li>- Control over spatial and temporal distribution of cell seeding</li> </ul>                                               | <ul style="list-style-type: none"> <li>- Specialized equipment is required (i.e., bioprinter).</li> <li>- Specialized equipment is required for culturing (i.e., bioreactor).</li> <li>- Thermal and mechanical stress.</li> <li>- Ejector clogging.</li> </ul> |
| Microfluidic   | <ul style="list-style-type: none"> <li>- Dynamic culture</li> <li>- Resembles the physiological environment (flow condition)</li> <li>- On-chip analysis</li> </ul>                                   | <ul style="list-style-type: none"> <li>- Specialized equipment is required (e.g., laser cutter).</li> <li>- Long-term culture is difficult.</li> <li>- Shear stress</li> <li>- Time-consuming</li> </ul>                                                        |
| Microwell      | <ul style="list-style-type: none"> <li>- Simple to perform</li> <li>- Ease to scale-up</li> <li>- Well-controlled 3-D model size</li> <li>- Designed geometry</li> <li>- Long-term culture</li> </ul> | <ul style="list-style-type: none"> <li>- Required specialized facility to fabricate the mold.</li> <li>- Long term culture ends when the cells outgrow of wells.</li> </ul>                                                                                     |

112

113

114

115

116 **Supplementary Table 2.** Determination of the microwell volume of three  
117 different microwell sizes (150  $\mu\text{m}$ , 300  $\mu\text{m}$ , and 450  $\mu\text{m}$ ) based on the mask  
118 design used during fabrication.

119

| Microwell Diameter & Height ( $\mu\text{m}$ ) | Microwell Volume ( $\mu\text{m}^3$ )<br>( $v = \pi r^2 h$ ) |
|-----------------------------------------------|-------------------------------------------------------------|
| 150 x 150                                     | $2.65 \times 10^6$                                          |
| 300 x 300                                     | $2.12 \times 10^7$                                          |
| 450 x 450                                     | $7.16 \times 10^7$                                          |

120

121

122

123

124

125

126

127

128

129

130

131

132

133

134

135

136

137

138

139

140

141

142
